# Supplementary material for: Immune Tolerance Induction (ITI) with a pdFVIII/VWF Concentrate (octanate) in 100 Patients in the Observational ITI (ObsITI) Study
Source: PubMed Central journal article supplement (PMC9135478; doi:10.1055/s-0042-1748756), 2022-05-26

**Supplementary Table S1** Daily FVIII dose by responder type, dosing frequency and dose

| Responder type<br>Dosing frequency | Daily dose at ITI start, IU/kg |              |                        |              |           |               |
|------------------------------------|--------------------------------|--------------|------------------------|--------------|-----------|---------------|
|                                    | Low dose <sup>a</sup>          |              | High dose <sup>b</sup> |              | All doses |               |
|                                    | <i>n</i>                       | Mean (SD)    | <i>n</i>               | Mean (SD)    | <i>N</i>  | Mean (SD)     |
| Low responders                     |                                |              |                        |              |           |               |
| 1x/day                             | 1                              | 27.8         | 8                      | 109.8 (21.7) | 9         | 100.7 (34.0)  |
| 2x/day                             | –                              | –            | 3                      | 210.9 (11.1) | 3         | 210.9 (11.1)  |
| 3x/week                            | –                              | –            | 1                      | 39.0         | 1         | 39.0          |
| 3.5x/week                          | –                              | –            | 1                      | 52.6         | 1         | 52.6          |
| <i>All frequencies</i>             | 1                              | 27.8         | 13                     | 123.3 (57.8) | 14        | 116.4 (61.1)  |
| High responders                    |                                |              |                        |              |           |               |
| 1x/day                             | 20                             | 93.9 (24.0)  | 4                      | 196.6 (32.4) | 24        | 111.0 (46.3)  |
| 2x/day                             | 3                              | 123.9 (16.8) | 42                     | 266.5 (77.3) | 45        | 257.0 (82.9)  |
| 2x/week                            | 1                              | 16.8         | –                      | –            | 1         | 16.8          |
| 3x/week                            | 9                              | 28.1 (7.5)   | –                      | –            | 9         | 28.1 (7.5)    |
| 4x/week                            | 1                              | 44.0         | –                      | –            | 1         | 44.0          |
| 3.5x/week                          | 6                              | 65.3 (27.9)  | –                      | –            | 6         | 65.3 (27.9)   |
| <i>All frequencies</i>             | 40                             | 73.9 (37.5)  | 46                     | 260.5 (76.9) | 86        | 173.7 (112.0) |
| All patients                       |                                |              |                        |              |           |               |
| 1x/day                             | 21                             | 90.7 (27.5)  | 12                     | 138.7 (49.1) | 33        | 108.2 (43.0)  |
| 2x/day                             | 3                              | 123.9 (16.8) | 45                     | 262.8 (75.9) | 48        | 254.2 (81.0)  |
| 2x/week                            | 1                              | 16.8         | –                      | –            | 1         | 16.8          |
| 3x/week                            | 9                              | 28.1 (7.5)   | 1                      | 39.0         | 10        | 29.2 (7.9)    |
| 4x/week                            | 1                              | 44.0         | –                      | –            | 1         | 44.0          |
| 3.5x/week                          | 6                              | 65.3 (27.9)  | 1                      | 52.6         | 7         | 63.5 (25.9)   |
| <i>All frequencies</i>             | 41                             | 72.7 (37.7)  | 59                     | 230.2 (92.5) | 100       | 165.7 (108.0) |

<sup>a</sup>Low dose: < 150 IU FVIII/kg/day for high responders, < 50 IU FVIII/kg either daily or every other day for low responders.

<sup>b</sup>High dose: ≥ 150 IU FVIII/kg/day for high responders, ≥ 50 IU FVIII/kg either daily or every other day for low responders.

Abbreviations: ITI, immune tolerance induction; IU, international units; SD, standard deviation.

**Supplementary Table S2** Daily FVIII dose by responder type, dosing frequency and dose in patients who achieved ITI success

| Responder type<br>Dosing frequency | Daily dose at ITI start in patients who achieved ITI success <sup>a</sup> , IU/kg |             |                        |               |           |               |
|------------------------------------|-----------------------------------------------------------------------------------|-------------|------------------------|---------------|-----------|---------------|
|                                    | Low dose <sup>b</sup>                                                             |             | High dose <sup>c</sup> |               | All doses |               |
|                                    | <i>n</i>                                                                          | Mean (SD)   | <i>n</i>               | Mean (SD)     | <i>N</i>  | Mean (SD)     |
| <i>Low responders</i>              |                                                                                   |             |                        |               |           |               |
| 1x/day                             | 1                                                                                 | 27.8        | 7                      | 111.7 (22.6)  | 8         | 101.2 (36.3)  |
| 2x/day                             | –                                                                                 | –           | 3                      | 210.9 (11.1)  | 3         | 210.9 (11.1)  |
| 3x/week                            | –                                                                                 | –           | 1                      | 39.0          | 1         | 39.0          |
| 3.5x/week                          | –                                                                                 | –           | 1                      | 52.6          | 1         | 52.6          |
| <i>All frequencies</i>             | 1                                                                                 | 27.8        | 12                     | 125.5 (59.8)  | 13        | 118.0 (63.4)  |
| <i>High responders</i>             |                                                                                   |             |                        |               |           |               |
| 1x/day                             | 14                                                                                | 90.5 (25.2) | 3                      | 184.6 (26.7)  | 17        | 107.1 (44.4)  |
| 2x/day                             | 1                                                                                 | 117.7       | 25                     | 268.7 (86.3)  | 26        | 262.9 (89.6)  |
| 2x/week                            | –                                                                                 | –           | –                      | –             | –         | –             |
| 3x/week                            | 8                                                                                 | 29.2 (7.2)  | –                      | –             | 8         | 29.2 (7.2)    |
| 4x/week                            | –                                                                                 | –           | –                      | –             | –         | –             |
| 3.5x/week                          | 6                                                                                 | 65.3 (27.9) | –                      | –             | 6         | 65.3 (27.9)   |
| <i>All frequencies</i>             | 29                                                                                | 69.3 (34.9) | 28                     | 259.7 (85.9)  | 57        | 162.8 (115.7) |
| <i>All patients</i>                |                                                                                   |             |                        |               |           |               |
| 1x/day                             | 15                                                                                | 86.3 (29.2) | 10                     | 133.6 (41.7)  | 25        | 105.2 (41.3)  |
| 2x/day                             | 1                                                                                 | 117.7       | 28                     | 262.5 (83.4)  | 29        | 257.5 (86.2)  |
| 2x/week                            | –                                                                                 | –           | –                      | –             | –         | –             |
| 3x/week                            | 8                                                                                 | 29.2 (7.2)  | 1                      | 39.0          | 9         | 30.3 (7.5)    |
| 4x/week                            | –                                                                                 | –           | –                      | –             | –         | –             |
| 3.5x/week                          | 6                                                                                 | 65.3 (27.9) | 1                      | 52.6          | 7         | 63.5 (25.9)   |
| <i>All frequencies</i>             | 30                                                                                | 67.9 (35.1) | 40                     | 219.5 (100.0) | 70        | 154.5 (109.0) |

<sup>a</sup>Success = Complete success or partial success.

<sup>b</sup>Low dose: < 150 IU FVIII/kg/day for high responders, < 50 IU FVIII/kg either daily or every other day for low responders.

<sup>c</sup>High dose: ≥ 150 IU FVIII/kg/day for high responders, ≥ 50 IU FVIII/kg either daily or every other day for low responders.

Abbreviations: ITI, immune tolerance induction; IU, international units; SD, standard deviation.

**Supplementary Table S3** Daily FVIII dose by responder type, dosing frequency and dose in patients who did not achieve ITI success

| Responder type<br>Dosing frequency | Daily dose at ITI start in patients who did not achieve ITI success <sup>a</sup> ,<br>IU/kg |              |                        |              |           |               |
|------------------------------------|---------------------------------------------------------------------------------------------|--------------|------------------------|--------------|-----------|---------------|
|                                    | Low dose <sup>b</sup>                                                                       |              | High dose <sup>c</sup> |              | All doses |               |
|                                    | <i>n</i>                                                                                    | Mean (SD)    | <i>n</i>               | Mean (SD)    | <i>N</i>  | Mean (SD)     |
| Low responders                     |                                                                                             |              |                        |              |           |               |
| 1x/day                             | –                                                                                           |              | 1                      | 96.2         | 1         | 96.2          |
| 2x/day                             | –                                                                                           | –            | –                      | –            | –         | –             |
| 3x/week                            | –                                                                                           | –            | –                      | –            | –         | –             |
| 3.5x/week                          | –                                                                                           | –            | –                      | –            | –         | –             |
| <i>All frequencies</i>             | –                                                                                           | –            | 1                      | 96.2         | 1         | 96.2          |
| High responders                    |                                                                                             |              |                        |              |           |               |
| 1x/day                             | 6                                                                                           | 101.7 (20.9) | 1                      | 232.6        | 7         | 120.4 (53.0)  |
| 2x/day                             | 2                                                                                           | 127.0 (22.5) | 17                     | 263.3 (64.1) | 19        | 249.0 (74.3)  |
| 2x/week                            | 1                                                                                           | 16.8         | –                      | –            | 1         | 16.8          |
| 3x/week                            | 1                                                                                           | 19.3         | –                      | –            | 1         | 19.3          |
| 4x/week                            | 1                                                                                           | 44.0         | –                      | –            | 1         | 44.0          |
| 3.5x/week                          | –                                                                                           | –            | –                      | –            | –         | –             |
| <i>All frequencies</i>             | 11                                                                                          | 85.8 (43.0)  | 18                     | 261.6 (62.6) | 29        | 195.0 (102.8) |
| All patients                       |                                                                                             |              |                        |              |           |               |
| 1x/day                             | 6                                                                                           | 101.7 (20.9) | 2                      | 164.4 (96.5) | 8         | 117.4 (49.8)  |
| 2x/day                             | 2                                                                                           | 127.0 (22.5) | 17                     | 263.3 (64.1) | 19        | 249.0 (74.3)  |
| 2x/week                            | 1                                                                                           | 16.8         | –                      | –            | 1         | 16.8          |
| 3x/week                            | 1                                                                                           | 19.3         | –                      | –            | 1         | 19.3          |
| 4x/week                            | 1                                                                                           | 44.0         | –                      | –            | 1         | 44.0          |
| 3.5x/week                          | –                                                                                           | –            | –                      | –            | –         | –             |
| <i>All frequencies</i>             | 11                                                                                          | 85.8 (43.0)  | 19                     | 252.9 (71.7) | 30        | 191.7 (102.6) |

<sup>a</sup>Success = Complete success or partial success.

<sup>b</sup>Low dose: < 150 IU FVIII/kg/day for high responders, < 50 IU FVIII/kg either daily or every other day for low responders.

<sup>c</sup>High dose: ≥ 150 IU FVIII/kg/day for high responders, ≥ 50 IU FVIII/kg either daily or every other day for low responders.

Abbreviations: ITI, immune tolerance induction; IU, international units; SD, standard deviation.

**Supplementary Table S4** Mean (SD) monthly bleeding rates during ITI in patients who achieved success and non-success patients

| BE severity<br>Dose group       | Non-success<br>patients<br>(n = 30) | ITI success <sup>a</sup> patients (n = 70) |                             |
|---------------------------------|-------------------------------------|--------------------------------------------|-----------------------------|
|                                 |                                     | Prior to negative<br>inhibitor             | After negative<br>inhibitor |
| <i>All BEs</i>                  |                                     |                                            |                             |
| All patients                    | 0.53 (0.88)                         | 0.39 (0.65)                                | 0.07 (0.13)                 |
| Low-dose patients <sup>b</sup>  | 0.38 (0.35)                         | 0.34 (0.42)                                | 0.09 (0.18)                 |
| High-dose patients <sup>c</sup> | 0.61 (1.07)                         | 0.43 (0.79)                                | 0.05 (0.08)                 |
| <i>Mild BEs</i>                 |                                     |                                            |                             |
| All patients                    | 0.15 (0.18)                         | 0.35 (0.60)                                | 0.07 (0.11)                 |
| Low-dose patients <sup>b</sup>  | 0.07 (0.04)                         | 0.18 (0.24)                                | 0.07 (0.13)                 |
| High-dose patients <sup>c</sup> | 0.21 (0.22)                         | 0.52 (0.78)                                | 0.06 (0.07)                 |
| <i>Moderate BEs</i>             |                                     |                                            |                             |
| All patients                    | 0.34 (0.52)                         | 0.30 (0.37)                                | 0.04 (0.05)                 |
| Low-dose patients <sup>b</sup>  | 0.23 (0.21)                         | 0.33 (0.34)                                | 0.03 (0.03)                 |
| High-dose patients <sup>c</sup> | 0.41 (0.65)                         | 0.27 (0.39)                                | 0.04 (0.06)                 |
| <i>Severe BEs</i>               |                                     |                                            |                             |
| All patients                    | 0.19 (0.30)                         | 0.12 (0.14)                                | 0.01 (0.02)                 |
| Low-dose patients <sup>b</sup>  | 0.16 (0.15)                         | 0.12 (0.10)                                | 0.01 (0.01)                 |
| High-dose patients <sup>c</sup> | 0.20 (0.36)                         | 0.12 (0.17)                                | 0.02 (0.02)                 |

<sup>a</sup>Complete success or partial success.

<sup>b</sup>Low dose: < 150 IU/kg/day for high responders, < 50 IU/kg either daily or every other day for low responders.

<sup>c</sup>High dose: ≥ 150 IU/kg/day for high responders, ≥ 50 IU/kg either daily or every other day for low responders.

Abbreviations: BE, bleeding episode; ITI, immune tolerance induction.

**Supplementary Figure S1** Proportion of patients achieving ITI success by 9 or 12 months or at any time from start of ITI. (A) overall population ( $n = 100$ ), (B) patients who achieved success ( $n = 70$ ).

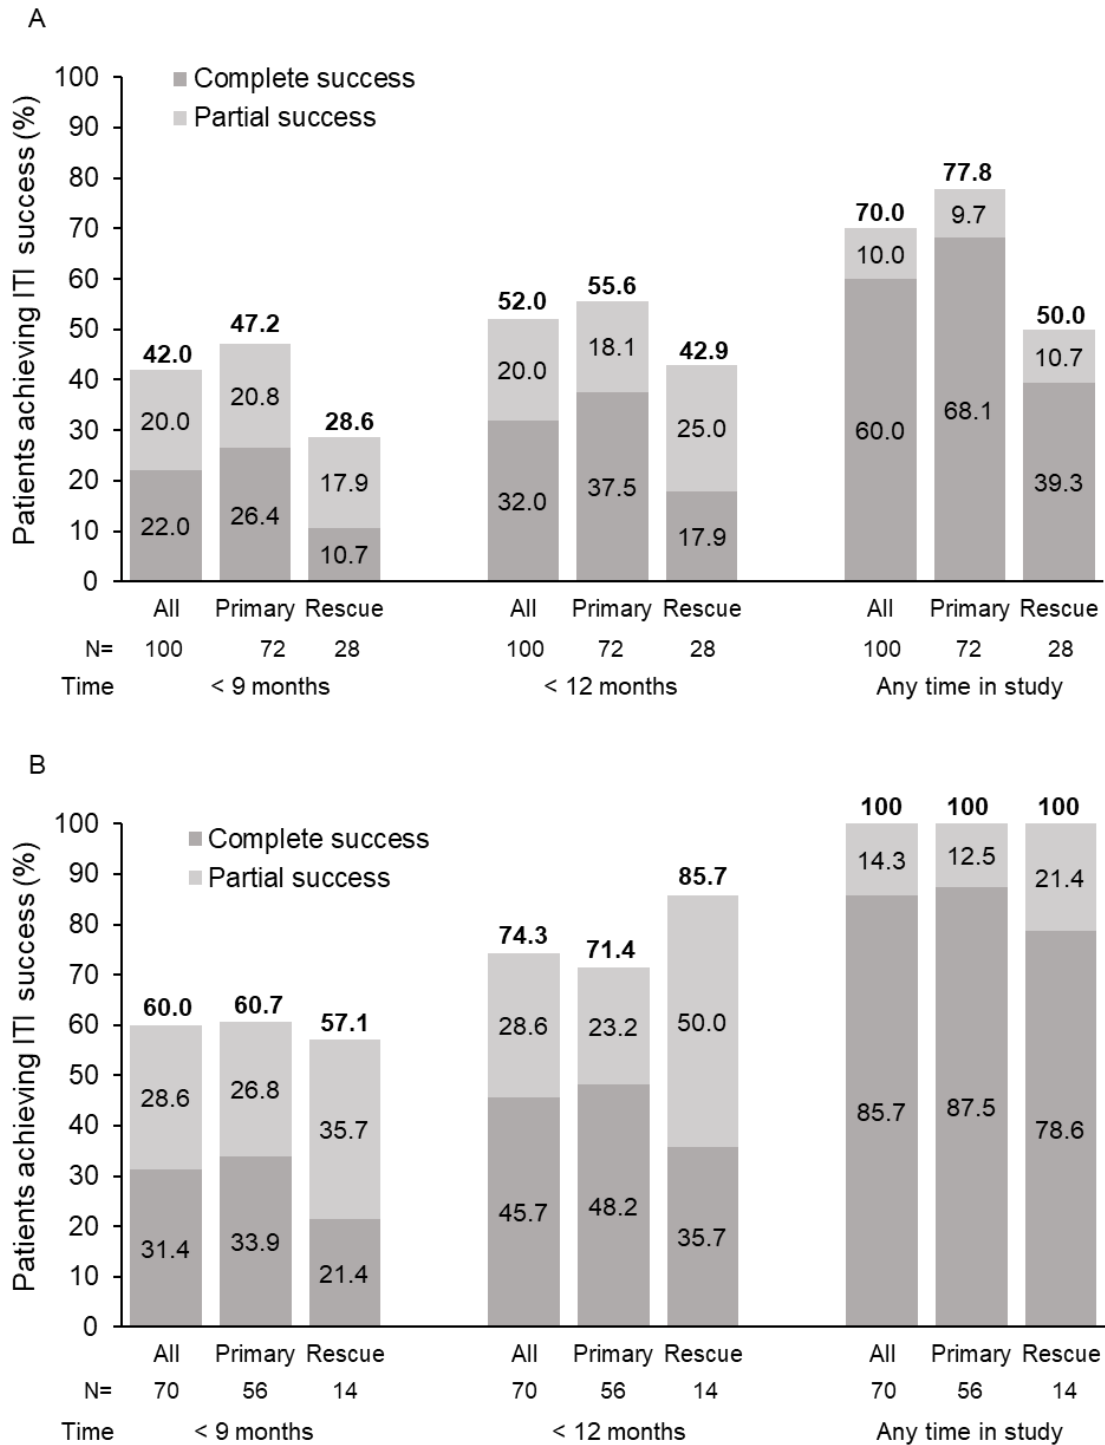

Supplement: 10-1055-s-0042-1748756-s210082.pdf [file 10-1055-s-0042-1748756-s210082.pdf]
